# Supplementary material for: Interval Type‐2 Fuzzy Multiattribute Group Decision‐Making for Logistics Services Providers Selection by Combining QFD with Partitioned Heronian Mean Operator
Source: Hindawi journal article supplement (doi:10.1155/2019/6727259), 2019-01-01
Supplement: f1 [file 6727259.f1.xlsx]

## Sheet: Sheet1
3	5	0	3	7	1	1	9	0	0	3	1	1	1	3	0	1	7	5	7	0	9	5	7	7	5	7	1	0	1	3.33333			5	0	9	5	4.75
5	7	0	5	9	3	3	10	0	1	5	3	3	3	5	0	3	9	7	9	1	10	7	9	9	7	9	3	1	3	4.96667			7	1	10	7	6.25
7	9	1	7	10	5	5	10	1	3	7	5	5	5	7	1	5	10	9	10	3	10	9	10	10	9	10	5	3	5	6.53333			9	3	10	9	7.75
4	6	0	4	8	2	2	9.5	0	0.5	4	2	2	2	4	0	2	8	6	8	0.5	9.5	6	8	8	6	8	2	0.5	2	4.15			6	0.5	9.5	6	5.5
5	7	0	5	9	3	3	10	0	1	5	3	3	3	5	0	3	9	7	9	1	10	7	9	9	7	9	3	1	3	4.96667			8	2	10	8	7
6	8	0.5	6	9.5	4	4	10	5	2	6	4	4	4	6	5	4	9.5	8	9.5	2	10	8	9.5	9.5	8	9.5	4	2	4	6.05			7	5	0	0	3
7	3	0	0	1	7	5	3	7	3	3	0	5	3	0	1	5	1	5	1	5	7	1	5	5	7	7	5	7	5	3.8			9	7	1	0	4.25
9	5	1	1	3	9	7	5	9	5	5	0	7	5	1	3	7	3	7	3	7	9	3	7	7	9	9	7	9	7	5.63333			10	9	3	1	5.75
10	7	3	3	5	10	9	7	10	7	7	1	9	7	3	5	9	5	9	5	9	10	5	9	9	10	10	9	10	9	7.36667			8	6	0.5	0	3.625
8	4	0.5	0.5	2	8	6	4	8	4	4	0	6	4	0.5	2	6	2	6	2	6	8	2	6	6	8	8	6	8	6	4.71667			9.5	8	2	0.5	5
9	5	1	1	3	9	7	5	9	5	5	0	7	5	1	3	7	3	7	3	7	9	3	7	7	9	9	7	9	7	5.63333			1	7	5	3	4
9.5	6	2	2	4	9.5	8	6	9.5	6	6	5	8	6	2	4	8	4	8	4	8	9.5	4	8	8	9.5	9.5	8	9.5	8	6.65			3	9	7	5	6
5	7	5	7	0	7	0	7	3	3	7	0	7	1	1	0	0	1	7	7	1	0	7	0	7	7	0	1	0	0	3.26667			5	10	9	7	7.75
7	9	7	9	1	9	1	9	5	5	9	1	9	3	3	0	1	3	9	9	3	1	9	1	9	9	1	3	1	1	4.9			2	8	6	4	5
9	10	9	10	3	10	3	10	7	7	10	3	10	5	5	1	3	5	10	10	5	3	10	3	10	10	3	5	3	3	6.5			4	9.5	8	6	6.875
6	8	6	8	0.5	8	0.5	8	4	4	8	0.5	8	2	2	0	0.5	2	8	8	2	0.5	8	0.5	8	8	0.5	2	0.5	0.5	4.08333			0	5	3	1	2.25
7	9	7	9	1	9	1	9	5	5	9	1	9	3	3	0	1	3	9	9	3	1	9	1	9	9	1	3	1	1	4.9			0	7	5	3	3.75
8	9.5	8	9.5	2	9.5	2	9.5	6	6	9.5	2	9.5	4	4	5	2	4	9.5	9.5	4	2	9.5	2	9.5	9.5	2	4	2	2	5.85			1	9	7	5	5.5
3	0	7	5	0	0	3	7	0	5	7	1	5	0	0	7	1	5	7	7	7	0	7	5	5	7	0	1	5	1	3.6			0	6	4	2	3
5	0	9	7	0	1	5	9	1	7	9	3	7	0	1	9	3	7	9	9	9	1	9	7	7	9	1	3	7	3	5.23333			0.5	8	6	4	4.625
7	1	10	9	1	3	7	10	3	9	10	5	9	1	3	10	5	9	10	10	10	3	10	9	9	10	3	5	9	5	6.83333			3	3	3	1	2.5
4	0	8	6	0	0.5	4	8	0.5	6	8	2	6	0	0.5	8	2	6	8	8	8	0.5	8	6	6	8	0.5	2	6	2	4.41667			5	5	5	3	4.5
5	0	9	7	0	1	5	9	1	7	9	3	7	0	1	9	3	7	9	9	9	1	9	7	7	9	1	3	7	3	5.23333			7	7	7	5	6.5
6	5	9.5	8	0.5	2	6	9.5	2	8	9.5	4	8	5	2	9.5	4	8	9.5	9.5	9.5	2	9.5	8	8	9.5	2	4	8	4	6.33333			4	4	4	2	3.5
7	0	0	7	7	0	7	1	0	7	7	1	0	7	0	7	7	0	0	7	0	1	1	0	0	9	0	7	7	7	3.46667			6	6	6	4	5.5
9	0	0	9	9	0	9	3	1	9	9	3	1	9	1	9	9	0	1	9	1	3	3	1	1	10	1	9	9	9	4.9			5	7	5	1	4.5
10	1	1	10	10	1	10	5	3	10	10	5	3	10	3	10	10	1	3	10	3	5	5	3	3	10	3	10	10	10	6.26667			7	9	7	3	6.5
8	0	0	8	8	0	8	2	0.5	8	8	2	0.5	8	0.5	8	8	0	0.5	8	0.5	2	2	0.5	0.5	9.5	0.5	8	8	8	4.18333			9	10	9	5	8.25
9	0	0	9	9	0	9	3	1	9	9	3	1	9	1	9	9	0	1	9	1	3	3	1	1	10	1	9	9	9	4.9			6	8	6	2	5.5
9.5	0.5	0.5	9.5	9.5	0.5	9.5	4	2	9.5	9.5	4	2	9.5	2	9.5	9.5	5	2	9.5	2	4	4	2	2	10	2	9.5	9.5	9.5	5.73333			8	9.5	8	4	7.375
																														#DIV/0!							#DIV/0!
5	7	1	7	1	0	7	3	0	0	0	7	1	3	0	1	3	1	5	7	7	7	5	0	5	5	7	7	5	3	3.66667			9	9	9	5	8
7	9	3	9	3	0	9	5	1	1	0	9	3	5	1	3	5	3	7	9	9	9	7	1	7	7	9	9	7	5	5.4			10	10	10	7	9.25
9	10	5	10	5	1	10	7	3	3	1	10	5	7	3	5	7	5	9	10	10	10	9	3	9	9	10	10	9	7	7.03333			10	10	10	9	9.75
6	8	2	8	2	0	8	4	0.5	0.5	0	8	2	4	0.5	2	4	2	6	8	8	8	6	0.5	6	6	8	8	6	4	4.53333			9.5	9.5	9.5	6	8.625
7	9	3	9	3	0	9	5	1	1	0	9	3	5	1	3	5	3	7	9	9	9	7	1	7	7	9	9	7	5	5.4			10	10	10	8	9.5
8	9.5	4	9.5	4	0.5	9.5	6	2	2	5	9.5	4	6	2	4	6	4	8	9.5	9.5	9.5	8	2	8	8	9.5	9.5	8	6	6.36667			3	3	9	0	3.75
1	1	7	0	3	7	0	5	1	7	3	7	5	5	7	3	7	5	5	7	5	7	7	0	7	7	1	1	7	7	4.5			5	5	10	0	5
3	3	9	1	5	9	0	7	3	9	5	9	7	7	9	5	9	7	7	9	7	9	9	1	9	9	3	3	9	9	6.36667			7	7	10	1	6.25
5	5	10	3	7	10	1	9	5	10	7	10	9	9	10	7	10	9	9	10	9	10	10	3	10	10	5	5	10	10	7.9			4	4	9.5	0	4.375
2	2	8	0.5	4	8	0	6	2	8	4	8	6	6	8	4	8	6	6	8	6	8	8	0.5	8	8	2	2	8	8	5.43333			6	6	10	0.5	5.625
3	3	9	1	5	9	0	7	3	9	5	9	7	7	9	5	9	7	7	9	7	9	9	1	9	9	3	3	9	9	6.36667			9	7	5	9	7.5
4	4	9.5	2	6	9.5	0.5	8	4	9.5	6	9.5	8	8	9.5	6	9.5	8	8	9.5	8	9.5	9.5	2	9.5	9.5	4	4	9.5	9.5	7.13333			10	9	7	10	9
3	1	7	7	0	0	1	7	7	1	0	7	1	3	0	0	0	9	5	7	7	0	7	7	7	7	5	1	5	0	3.73333			10	10	9	10	9.75
5	3	9	9	0	1	3	9	9	3	1	9	3	5	1	1	1	10	7	9	9	1	9	9	9	9	7	3	7	1	5.4			9.5	8	6	9.5	8.25
7	5	10	10	1	3	5	10	10	5	3	10	5	7	3	3	3	10	9	10	10	3	10	10	10	10	9	5	9	3	6.93333			10	9.5	8	10	9.375
4	2	8	8	0	0.5	2	8	8	2	0.5	8	2	4	0.5	0.5	0.5	9.5	6	8	8	0.5	8	8	8	8	6	2	6	0.5	4.56667			7	0	1	9	4.25
5	3	9	9	0	1	3	9	9	3	1	9	3	5	1	1	1	10	7	9	9	1	9	9	9	9	7	3	7	1	5.4			9	0	3	10	5.5
6	4	9.5	9.5	0.5	2	4	9.5	9.5	4	2	9.5	4	6	2	2	2	10	8	9.5	9.5	2	9.5	9.5	9.5	9.5	8	4	8	2	6.16667			10	1	5	10	6.5
7	7	1	5	0	7	3	1	0	3	1	7	1	0	0	7	1	7	0	9	5	7	0	1	0	5	7	5	7	1	3.5			8	0	2	9.5	4.875
9	9	3	7	0	9	5	3	0	5	3	9	3	1	0	9	3	9	1	10	7	9	0	3	1	7	9	7	9	3	5.1			9.5	0.5	4	10	6
10	10	5	9	1	10	7	5	1	7	5	10	5	3	1	10	5	10	3	10	9	10	1	5	3	9	10	9	10	5	6.6			1	1	3	1	1.5
8	8	2	6	0	8	4	2	0	4	2	8	2	0.5	0	8	2	8	0.5	9.5	6	8	0	2	0.5	6	8	6	8	2	4.3			3	3	5	3	3.5
9	9	3	7	0	9	5	3	0	5	3	9	3	1	0	9	3	9	1	10	7	9	0	3	1	7	9	7	9	3	5.1			5	5	7	5	5.5
9.5	9.5	4	8	0.5	9.5	6	4	5	6	4	9.5	4	2	5	9.5	4	9.5	2	10	8	9.5	5	4	2	8	9.5	8	9.5	4	6.3			2	2	4	2	2.5
1	0	7	3	1	5	0	7	1	0	5	1	7	3	1	7	7	5	0	7	5	0	5	0	9	1	7	7	0	7	3.63333			4	4	6	4	4.5
3	1	9	5	3	7	0	9	3	1	7	3	9	5	3	9	9	7	1	9	7	1	7	1	10	3	9	9	1	9	5.33333			5	1	0	7	3.25
5	3	10	7	5	9	1	10	5	1	9	5	10	7	5	10	10	9	3	10	9	3	9	3	10	5	10	10	3	10	6.86667			7	3	0	9	4.75
2	0.5	8	4	2	6	0	8	2	0.5	6	2	8	4	2	8	8	6	0.5	8	6	0.5	6	0.5	9.5	2	8	8	0.5	8	4.48333			9	5	1	10	6.25
3	1	9	5	3	7	0	9	3	1	7	3	9	5	3	9	9	7	1	9	7	1	7	1	10	3	9	9	1	9	5.33333			6	2	0	8	4
4	2	9.5	6	4	8	0.5	9.5	4	2	8	4	9.5	6	4	9.5	9.5	8	2	9.5	8	2	8	2	10	4	9.5	9.5	2	9.5	6.13333			8	4	0.5	9.5	5.5
																														#DIV/0!							#DIV/0!
9	3	1	1	7	1	1	0	1	1	7	3	0	7	1	3	5	7	5	5	7	0	7	0	1	1	5	7	5	5	3.53333			3	5	1	5	3.5
10	5	3	3	9	3	3	0	3	3	9	5	0	9	3	5	7	9	7	7	9	1	9	0	3	3	7	9	7	7	5.26667			5	7	3	7	5.5
10	7	5	5	10	5	5	1	5	5	10	7	1	10	5	7	9	10	9	9	10	3	10	1	5	5	9	10	9	9	6.86667			7	9	5	9	7.5
9.5	4	2	2	8	2	2	0	2	2	8	4	0	8	2	4	6	8	6	6	8	0.5	8	0	2	2	6	8	6	6	4.4			4	6	2	6	4.5
10	5	3	3	9	3	3	0	3	3	9	5	0	9	3	5	7	9	7	7	9	1	9	0	3	3	7	9	7	7	5.26667			6	8	4	8	6.5
10	6	4	4	9.5	4	4	0.5	4	4	9.5	6	5	9.5	4	6	8	9.5	8	8	9.5	2	9.5	0.5	4	4	8	9.5	8	8	6.21667			1	1	0	7	2.25
3	1	1	7	3	0	7	1	5	0	0	7	1	5	9	7	5	9	3	0	1	7	9	0	7	3	0	7	7	5	4			3	3	0	9	3.75
5	3	3	9	5	1	9	3	7	0	0	9	3	7	10	9	7	10	5	1	3	9	10	1	9	5	1	9	9	7	5.63333			5	5	1	10	5.25
7	5	5	10	7	3	10	5	9	1	1	10	5	9	10	10	9	10	7	3	5	10	10	3	10	7	3	10	10	9	7.1			2	2	0	8	3
4	2	2	8	4	0.5	8	2	6	0	0	8	2	6	9.5	8	6	9.5	4	0.5	2	8	9.5	0.5	8	4	0.5	8	8	6	4.81667			4	4	0.5	9.5	4.5
5	3	3	9	5	1	9	3	7	0	0	9	3	7	10	9	7	10	5	1	3	9	10	1	9	5	1	9	9	7	5.63333			0	0	0	1	0.25
6	4	4	9.5	6	2	9.5	4	8	0.5	0.5	9.5	4	8	10	9.5	8	10	6	2	4	9.5	10	2	9.5	6	2	9.5	9.5	8	6.36667			1	1	0	3	1.25
5	1	3	7	5	0	3	1	7	1	3	5	7	0	3	0	5	1	7	7	5	5	0	0	5	7	0	9	1	5	3.6			3	3	1	5	3
7	3	5	9	7	0	5	3	9	3	5	7	9	0	5	1	7	3	9	9	7	7	1	0	7	9	1	10	3	7	5.26667			0.5	0.5	0	2	0.75
9	5	7	10	9	1	7	5	10	5	7	9	10	1	7	3	9	5	10	10	9	9	3	1	9	10	3	10	5	9	6.9			2	2	0.5	4	2.125
6	2	4	8	6	0	4	2	8	2	4	6	8	0	4	0.5	6	2	8	8	6	6	0.5	0	6	8	0.5	9.5	2	6	4.43333			9	0	1	7	4.25
7	3	5	9	7	0	5	3	9	3	5	7	9	0	5	1	7	3	9	9	7	7	1	0	7	9	1	10	3	7	5.26667			10	0	3	9	5.5
8	4	6	9.5	8	0.5	6	4	9.5	4	6	8	9.5	5	6	2	8	4	9.5	9.5	8	8	2	5	8	9.5	2	10	4	8	6.38333			10	1	5	10	6.5
9	1	7	3	5	0	5	0	0	3	7	3	5	0	7	1	0	9	3	5	9	7	3	0	7	7	7	1	5	0	3.96667			9.5	0	2	8	4.875
10	3	9	5	7	0	7	0	1	5	9	5	7	0	9	3	0	10	5	7	10	9	5	1	9	9	9	3	7	0	5.46667			10	0.5	4	9.5	6
10	5	10	7	9	1	9	1	1	7	10	7	9	1	10	5	1	10	7	9	10	10	7	3	10	10	10	5	9	1	6.8			7	3	1	0	2.75
9.5	2	8	4	6	0	6	0	0.5	4	8	4	6	0	8	2	0	9.5	4	6	9.5	8	4	0.5	8	8	8	2	6	0	4.71667			9	5	3	0	4.25
10	3	9	5	7	0	7	0	1	5	9	5	7	0	9	3	0	10	5	7	10	9	5	1	9	9	9	3	7	0	5.46667			10	7	5	1	5.75
10	4	9.5	6	8	0.5	8	0.5	2	6	9.5	6	8	5	9.5	4	5	10	6	8	10	9.5	6	2	9.5	9.5	9.5	4	8	0.5	6.46667			8	4	2	0	3.5
7	1	7	1	0	3	1	7	3	5	3	7	1	3	9	0	7	5	7	9	7	0	0	9	7	0	9	9	5	7	4.63333			9.5	6	4	0.5	5
9	3	9	3	0	5	3	9	5	7	5	9	3	5	10	1	9	7	9	10	9	1	1	10	9	0	10	10	7	9	6.23333			0	0	3	9	3
10	5	10	5	1	7	5	10	7	9	7	10	5	7	10	3	10	9	10	10	10	3	3	10	10	1	10	10	9	10	7.53333			1	1	5	10	4.25
8	2	8	2	0	4	2	8	4	6	4	8	2	4	9.5	0.5	8	6	8	9.5	8	0.5	0.5	9.5	8	0	9.5	9.5	6	8	5.43333			3	3	7	10	5.75
9	3	9	3	0	5	3	9	5	7	5	9	3	5	10	1	9	7	9	10	9	1	1	10	9	0	10	10	7	9	6.23333			0.5	0.5	4	9.5	3.625
9.5	4	9.5	4	0.5	6	4	9.5	6	8	6	9.5	4	6	10	2	9.5	8	9.5	10	9.5	2	2	10	9.5	0.5	10	10	8	9.5	6.88333			2	2	6	10	5
																														#DIV/0!							#DIV/0!
7	5	3	1	0	5	0	3	7	7	1	1	5	0	0	5	1	0	0	5	7	3	5	3	7	7	5	3	7	1	3.46667			5	0	1	7	3.25
9	7	5	3	0	7	0	5	9	9	3	3	7	0	1	7	3	1	1	7	9	5	7	5	9	9	7	5	9	3	5.16667			7	0	3	9	4.75
10	9	7	5	1	9	1	7	10	10	5	5	9	1	3	9	5	3	3	9	10	7	9	7	10	10	9	7	10	5	6.83333			9	1	5	10	6.25
8	6	4	2	0	6	0	4	8	8	2	2	6	0	0.5	6	2	0.5	0.5	6	8	4	6	4	8	8	6	4	8	2	4.31667			6	0	2	8	4
9	7	5	3	0	7	0	5	9	9	3	3	7	0	1	7	3	1	1	7	9	5	7	5	9	9	7	5	9	3	5.16667			8	0.5	4	9.5	5.5
9.5	8	6	4	0.5	8	0.5	6	9.5	9.5	4	4	8	5	2	8	4	2	2	8	9.5	6	8	6	9.5	9.5	8	6	9.5	4	6.15			9	3	1	0	3.25
9	1	7	1	5	7	5	1	7	9	7	1	1	5	3	7	5	7	3	9	7	3	9	0	7	0	9	7	5	5	5.06667			10	5	3	1	4.75
10	3	9	3	7	9	7	3	9	10	9	3	3	7	5	9	7	9	5	10	9	5	10	0	9	1	10	9	7	7	6.8			10	7	5	3	6.25
10	5	10	5	9	10	9	5	10	10	10	5	5	9	7	10	9	10	7	10	10	7	10	1	10	3	10	10	9	9	8.13333			9.5	4	2	0.5	4
9.5	2	8	2	6	8	6	2	8	9.5	8	2	2	6	4	8	6	8	4	9.5	8	4	9.5	0	8	0.5	9.5	8	6	6	5.93333			10	6	4	2	5.5
10	3	9	3	7	9	7	3	9	10	9	3	3	7	5	9	7	9	5	10	9	5	10	0	9	1	10	9	7	7	6.8			7	3	3	5	4.5
10	4	9.5	4	8	9.5	8	4	9.5	10	9.5	4	4	8	6	9.5	8	9.5	6	10	9.5	6	10	0.5	9.5	2	10	9.5	8	8	7.46667			9	5	5	7	6.5
0	5	3	1	7	1	5	7	1	3	0	5	1	1	9	7	7	0	5	7	7	0	5	7	3	5	7	5	0	7	4.03333			10	7	7	9	8.25
0	7	5	3	9	3	7	9	3	5	0	7	3	3	10	9	9	1	7	9	9	1	7	9	5	7	9	7	0	9	5.73333			8	4	4	6	5.5
1	9	7	5	10	5	9	10	5	7	1	9	5	5	10	10	10	3	9	10	10	3	9	10	7	9	10	9	1	10	7.26667			9.5	6	6	8	7.375
0	6	4	2	8	2	6	8	2	4	0	6	2	2	9.5	8	8	0.5	6	8	8	0.5	6	8	4	6	8	6	0	8	4.88333			1	9	5	1	4
0	7	5	3	9	3	7	9	3	5	0	7	3	3	10	9	9	1	7	9	9	1	7	9	5	7	9	7	0	9	5.73333			3	10	7	3	5.75
0.5	8	6	4	9.5	4	8	9.5	4	6	5	8	4	4	10	9.5	9.5	2	8	9.5	9.5	2	8	9.5	6	8	9.5	8	0.5	9.5	6.65			5	10	9	5	7.25
1	5	7	5	1	5	3	1	0	0	7	5	3	7	1	3	0	7	0	0	9	5	7	7	3	7	1	3	9	0	3.73333			2	9.5	6	2	4.875
3	7	9	7	3	7	5	3	0	0	9	7	5	9	3	5	0	9	1	1	10	7	9	9	5	9	3	5	10	0	5.33333			4	10	8	4	6.5
5	9	10	9	5	9	7	5	1	1	10	9	7	10	5	7	1	10	3	3	10	9	10	10	7	10	5	7	10	1	6.83333			5	0	0	5	2.5
2	6	8	6	2	6	4	2	0	0	8	6	4	8	2	4	0	8	0.5	0.5	9.5	6	8	8	4	8	2	4	9.5	0	4.53333			7	0	0	7	3.5
3	7	9	7	3	7	5	3	0	0	9	7	5	9	3	5	0	9	1	1	10	7	9	9	5	9	3	5	10	0	5.33333			9	1	1	9	5
4	8	9.5	8	4	8	6	4	0.5	0.5	9.5	8	6	9.5	4	6	5	9.5	2	2	10	8	9.5	9.5	6	9.5	4	6	10	0.5	6.23333			6	0	0	6	3
3	3	7	5	1	7	1	7	0	3	3	7	3	1	9	0	5	1	9	3	3	9	3	7	3	0	0	9	7	5	4.13333			8	0.5	0.5	8	4.25
5	5	9	7	3	9	3	9	0	5	5	9	5	3	10	0	7	3	10	5	5	10	5	9	5	1	1	10	9	7	5.8			3	3	3	1	2.5
7	7	10	9	5	10	5	10	1	7	7	10	7	5	10	1	9	5	10	7	7	10	7	10	7	3	3	10	10	9	7.26667			5	5	5	3	4.5
4	4	8	6	2	8	2	8	0	4	4	8	4	2	9.5	0	6	2	9.5	4	4	9.5	4	8	4	0.5	0.5	9.5	8	6	4.96667			7	7	7	5	6.5
5	5	9	7	3	9	3	9	0	5	5	9	5	3	10	0	7	3	10	5	5	10	5	9	5	1	1	10	9	7	5.8			4	4	4	2	3.5
6	6	9.5	8	4	9.5	4	9.5	0.5	6	6	9.5	6	4	10	5	8	4	10	6	6	10	6	9.5	6	2	2	10	9.5	8	6.68333			6	6	6	4	5.5
																																					#DIV/0!
																																	0	1	3	0	1
																																	1	3	5	0	2.25
																																	3	5	7	1	4
																																	0.5	2	4	0	1.625
																																	2	4	6	0.5	3.125
																																	9	3	3	1	4
																																	10	5	5	3	5.75
																																	10	7	7	5	7.25
																																	9.5	4	4	2	4.875
																																	10	6	6	4	6.5
																																	5	3	3	3	3.5
																																	7	5	5	5	5.5
																																	9	7	7	7	7.5
																																	6	4	4	4	4.5
																																	8	6	6	6	6.5
																																	3	3	9	5	5
																																	5	5	10	7	6.75
																																	7	7	10	9	8.25
																																	4	4	9.5	6	5.875
																																	6	6	10	8	7.5
																																	0	0	3	3	1.5
																																	0	0	5	5	2.5
																																	1	1	7	7	4
																																	0	0	4	4	2
																																	0.5	0.5	6	6	3.25
																																	9	0	0	3	3
																																	10	0	0	5	3.75
																																	10	1	1	7	4.75
																																	9.5	0	0	4	3.375
																																	10	0.5	0.5	6	4.25
